# Supplementary material for: The enhanced antitumor-specific immune response with mannose- and CpG-ODN-coated liposomes delivering TRP2 peptide
Source: PubMed Central journal article supplement — Theranostics. 2018 Feb 12;8(6):1723–39. doi: 10.7150/thno.22056 (PMC5858178; doi:10.7150/thno.22056), 2018-02-12
Supplement: thnov08p1723s1.pdf [file thnov08p1723s1.pdf]

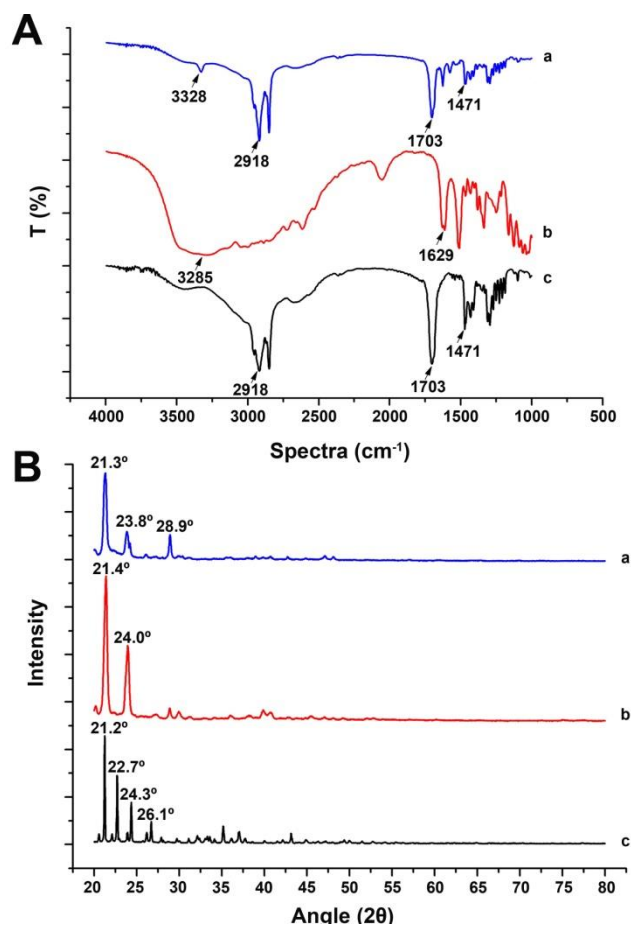

### Supplementary Figure S1.

(A) FTIR analysis of mannose lipid, mannose, and palmitic acid. a: mannose lipid; b: mannose; c: palmitic acid; (B) X-ray diffractometry of strong absorption peaks for mannose lipid at  $2\theta = 21.3^\circ$ ,  $23.8^\circ$ , and  $28.9^\circ$ , of palmitic acid ( $2\theta = 21.2^\circ$ ,  $22.7^\circ$ ,  $24.3^\circ$ , and  $26.1^\circ$ ) or mannose ( $2\theta = 21.4^\circ$ , and  $24.0^\circ$ ). a: mannose lipid; b: mannose; c: palmitic acid.
